# Supplementary material
Source: publisher figshare collection journal article supplement (https://frontiersin.figshare.com/ndownloader/files/15192227)
Supplement: Supplementary file 1 [file 15192227]

**Fig. S2** Voltage Maps, L1 French

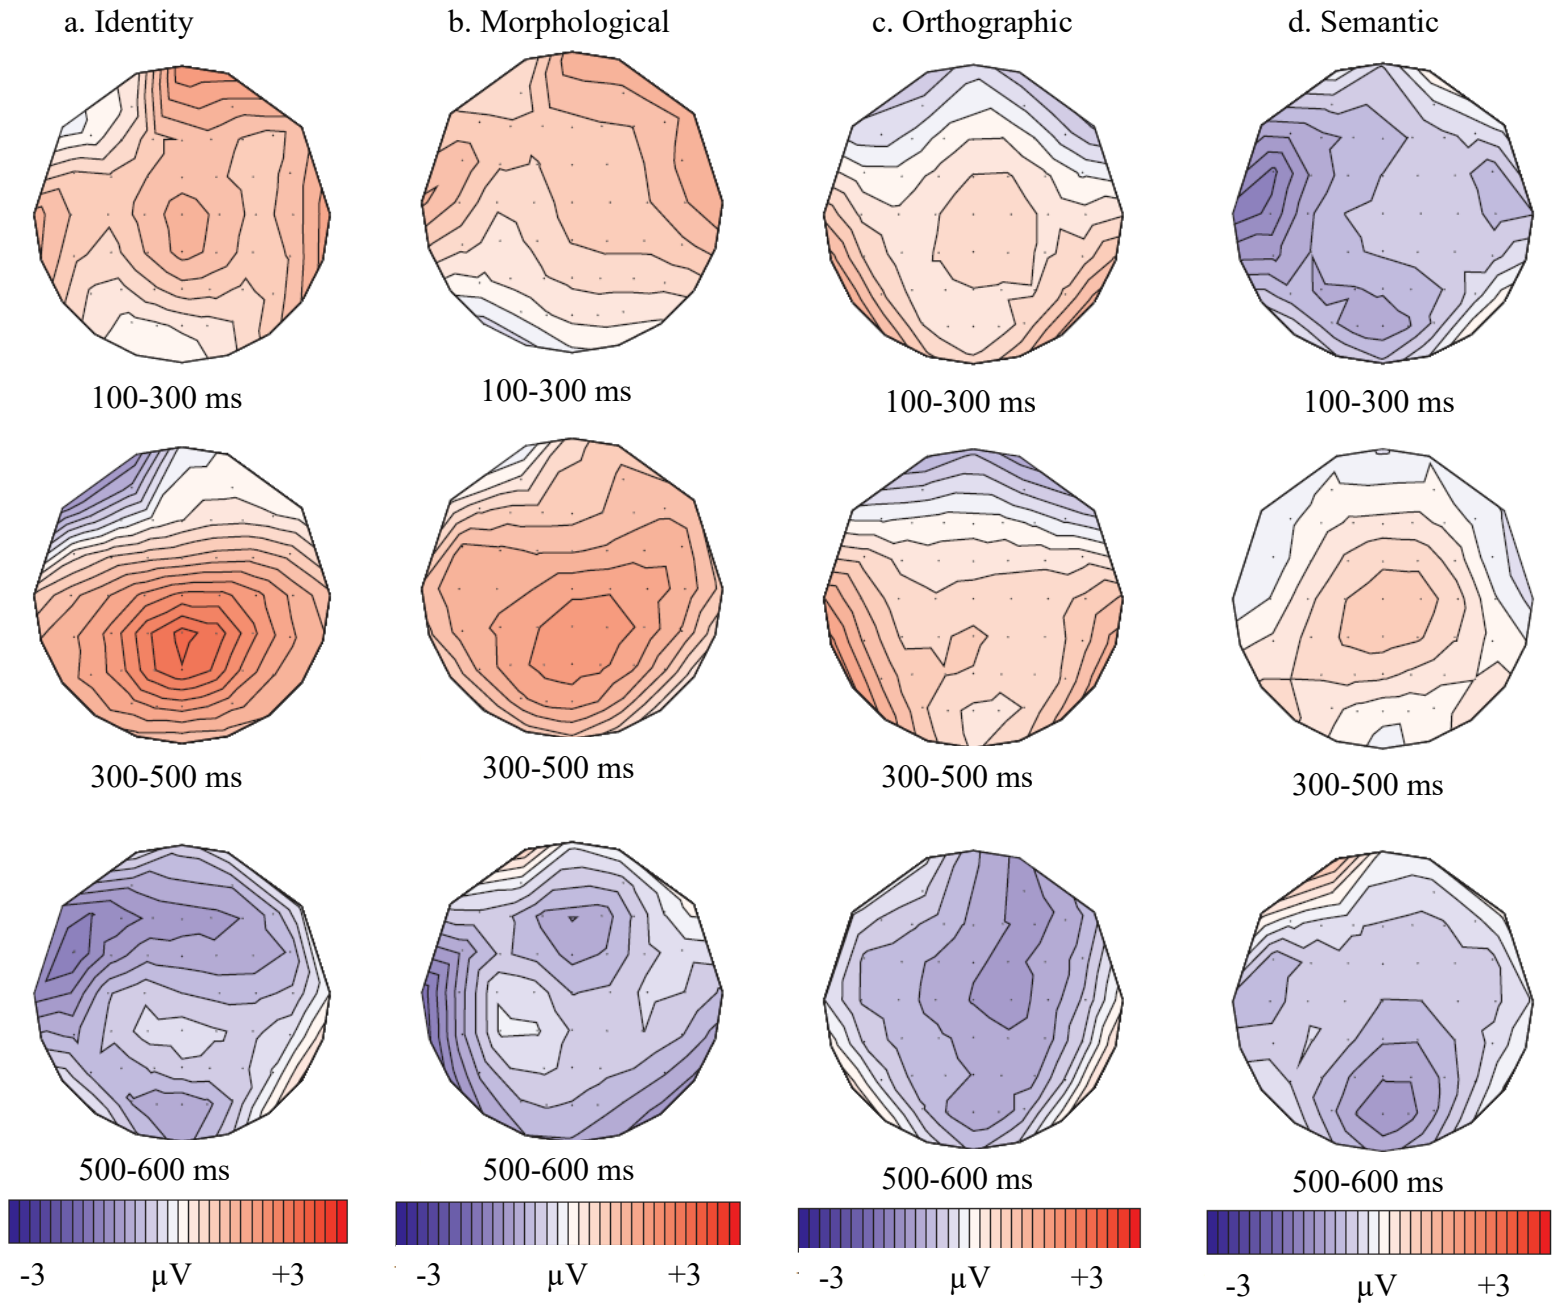

**Fig. S2** Voltage maps for L1 French speakers for (a) identity, (b) morphological, (c) orthographic, and (d) semantic conditions. Three time-windows are shown for each condition. The voltage maps reflect the related items minus the unrelated items for each condition.
